# Supplementary material for: Conservation analysis of the CydX protein yields insights into small protein identification and evolution
Source: PubMed Central journal article supplement (PMC4325964; doi:10.1186/1471-2164-15-946), 2014-12-05
Supplement: 12864_2014_6987_MOESM2_ESM.pdf [file 12864_2014_6987_MOESM2_ESM.pdf]

A

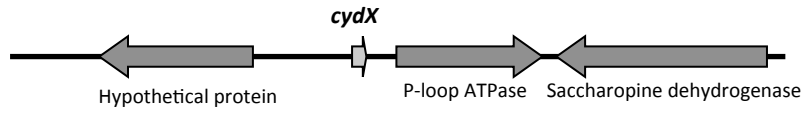

```

Escherichia      MWYFAWILGTLACSGVITALE-----HVESGKAGQEDI--
Burkholderia    MWYFTWILGIGVALGFGIINVMWLEAGDKFTRDPQARARAVPATPEDAPS
****:****  :* .*:*.:.: **                .. : * **
  
```

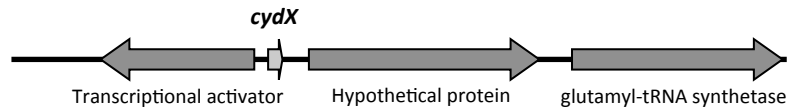

```

Escherichia      MWYFAWILGTLACSGVITALEHV--ESGKAGQEDI
Cellvibrio      MWYFTWILGVLLACAFGIINAMWLENAVTDQGHGRQE--
****:****.****:*.*:*.:.: **.. :.:.: **
  
```

B

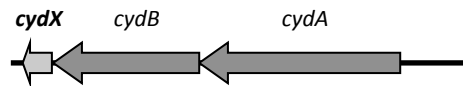

```

Escherichia      -----MWYFAWILGTLACSGVITALEHVESGKAGQEDI--
Acidithiobacillus MKNLLTFIGLAAVMVLSLFLAVITGDYGPWYFAWLVGTTMIVLISAAGAIMFDRQDEEQQRKQGSTH
****:**** : .. * : :. : . : :.
  
```
