# Supplementary material for: Conservation analysis of the CydX protein yields insights into small protein identification and evolution
Source: PubMed Central journal article supplement (PMC4325964; doi:10.1186/1471-2164-15-946), 2014-12-05
Supplement: 12864_2014_6987_MOESM3_ESM.pdf [file 12864_2014_6987_MOESM3_ESM.pdf]

|                      |                                              |
|----------------------|----------------------------------------------|
| <b>Escherichia</b>   | <b>MWYFAWILGTLACSGVITALALEHVESGKAGQEDI</b>   |
| <b>H. ducreyi</b>    | <b>MFYVTWVLGILLAILFATVVTIGIE-----KSGKFDE</b> |
| <b>H. influenzae</b> | <b>MLYAIWVVGVLFAIWASAKCTINKE-----KKGKFEE</b> |
|                      | <b>* * *::* *:* .. :: * * * :</b>            |

|                        |                                             |
|------------------------|---------------------------------------------|
| <b>Escherichia</b>     | <b>MWYFAWILGTLACSGVITALALEHVESGKAGQEDI</b>  |
| <b>F. cf. novicida</b> | <b>MYLAWIISAGLAVTVGCFVATRLEKKEDNSK-----</b> |
| <b>F. philomiragia</b> | <b>MFYLLWITSAPFVAVGAGCFVASRIDKKED-----</b>  |
|                        | <b>*:*: ** .. :* * :.* ::: *</b>            |
