# Supplementary material for: Conservation analysis of the CydX protein yields insights into small protein identification and evolution
Source: PubMed Central journal article supplement (PMC4325964; doi:10.1186/1471-2164-15-946), 2014-12-05
Supplement: 12864_2014_6987_MOESM4_ESM.pdf [file 12864_2014_6987_MOESM4_ESM.pdf]

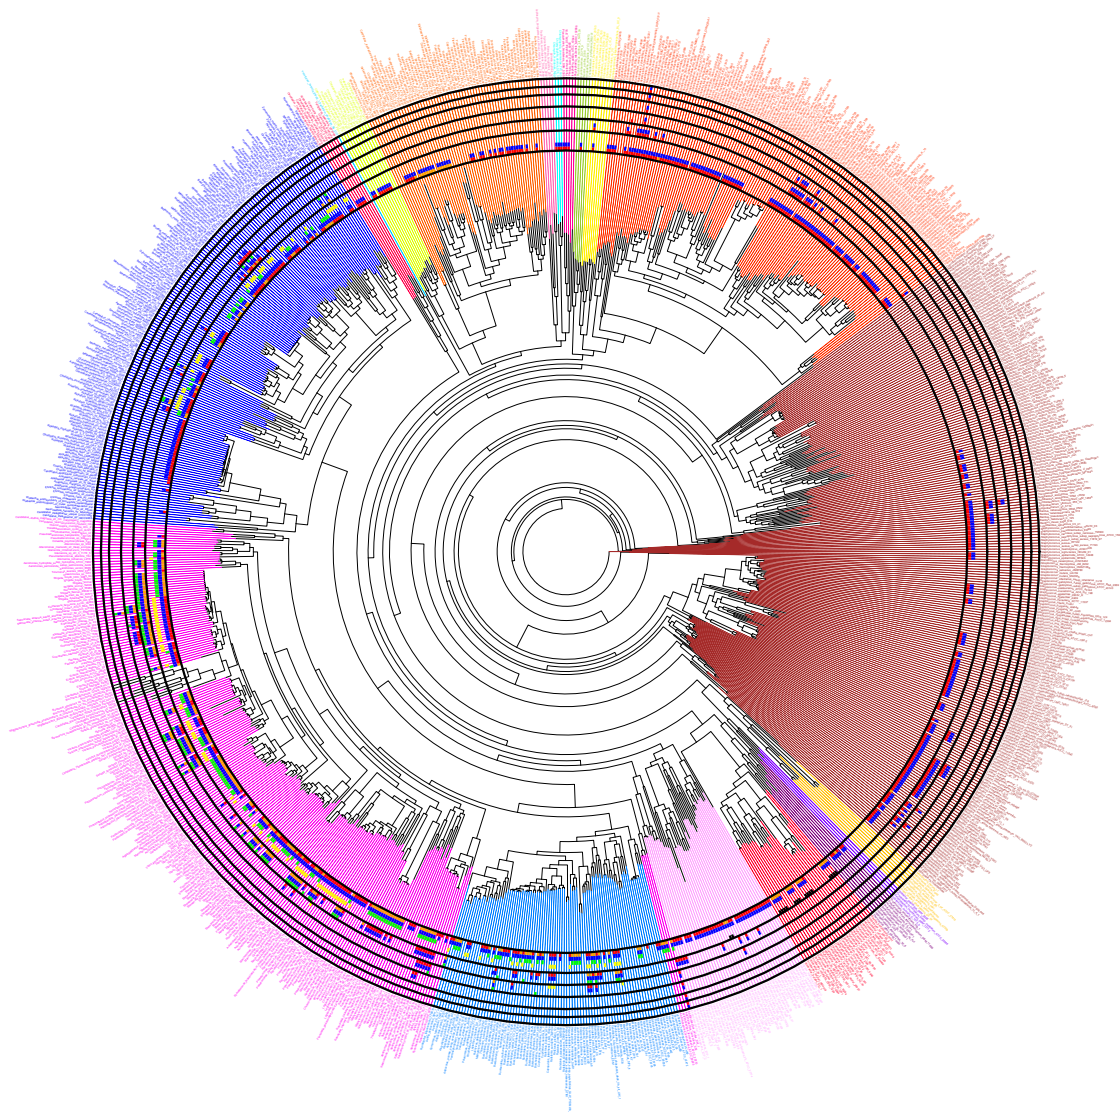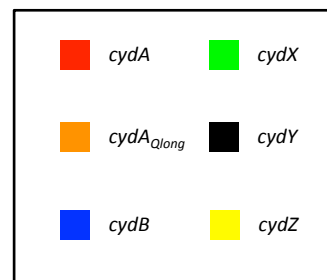

Additional File 4
