# Supplementary material for: Conservation analysis of the CydX protein yields insights into small protein identification and evolution
Source: PubMed Central journal article supplement (PMC4325964; doi:10.1186/1471-2164-15-946), 2014-12-05
Supplement: 12864_2014_6987_MOESM5_ESM.pdf [file 12864_2014_6987_MOESM5_ESM.pdf]

A

**Leptospirillum**  
**Sideroxydans**

MWYFVWIVGVTMAVTL SVMHALWFEIQEDQVTIDRLRVDGKY  
MWYFAWILGVSMAILLAIVNTMMCDAQACVTKEESSDKE  
\*\*\*\*.\*:\*:\*:\*:\* \*::: : \* : :

B

**pTM1**  
**Rhodospirillum**

MWYFAWLLGLPLACFAVLNAMWFEMKEDAAEGQP-----  
MWYFAWLLGLPLAVVFAVLNGLWFELREDAARGQPDPDAF  
\*\*\*\*\* .\*\*\*\*\*.\*:\*:\*:\* \* \* \*
